# Supplementary material for: Balancing accuracy and efficiency in density functional theory studies of SiO 2 polymorphs
Source: Royal Society of Chemistry journal article supplement (doi:10.1039/d5cp04069h), 2025-12-15
Supplement: d5cp04069h2.xlsx [file d5cp04069h2.xlsx]

## Sheet: Overview
Hyperlinks to individual results sheets
Functional	Basis set	Further information	Link
PBE-D3	m-DZVP-SR	Zero-damping, no C9	PBE-D3 DZVP-SR
PBE-D3	m-TZVP	Zero-damping, no C9	PBE-D3 TZVP
PBE-D3	m-TZV2P	Zero-damping, no C9	PBE-D3 TZV2P
PBE-D3	m-TZV2PX	Zero-damping, no C9	PBE-D3 TZV2PX
PBE-D3	m-TZVP	Zero-damping, with C9	PBE-D3 C9 TZVP
PBE-D3	m-TZV2PX	Zero-damping, with C9	PBE-D3 C9 TZV2PX
PBE-D3	m-TZVP	BJ-damping, no C9	PBE-D3 BJ TZVP
PBE-D3	m-TZVP	BJ-damping, with C9	PBE-D3 BJ C9 TZVP
PBEsol-D3	m-TZVP	Zero-damping, no C9	PBEsol-D3 TZVP
PBEsol-D3	m-TZVP	Zero-damping, with C9	PBEsol-D3 C9 TZVP
PBEsol-D3	m-TZV2PX	Zero-damping, with C9	PBEsol-D3 C9 TZV2PX
PBEsol-D3	m-TZVP	BJ-damping, no C9	PBEsol-D3 BJ TZVP
revPBE-D3	m-TZVP	Zero-damping, no C9	revPBE-D3 TZVP
revPBE-D3	m-TZVP	Zero-damping, with C9	revPBE-D3 C9 TZVP
revPBE-D3	m-TZVP	BJ-damping, no C9	revPBE-D3 BJ TZVP
RPBE-D3	m-TZVP	Zero-damping, no C9	RPBE-D3 TZVP
RPBE-D3	m-TZVP	Zero-damping, with C9	RPBE-D3 C9 TZVP
RPBE-D3	m-TZV2PX	Zero-damping, with C9	RPBE-D3 C9 TZV2PX
RPBE-D3	m-TZVP	BJ-damping, no C9	RPBE-D3 BJ TZVP
SSB-D3	m-TZVP	Zero-damping, no C9	SSB-D3 TZVP
SSB-D3	m-TZVP	Zero-damping, with C9	SSB-D3 C9 TZVP
SSB-D3	m-TZV2PX	Zero-damping, with C9	SSB-D3 C9 TZV2PX
SSB-D3	m-TZVP	BJ-damping, no C9	SSB-D3 BJ TZVP
revSSB-D3	m-TZVP	Zero-damping, no C9	revSSB-D3 TZVP
revSSB-D3	m-TZVP	Zero-damping, with C9	revSSB-D3 C9 TZVP
revSSB-D3	m-TZV2PX	Zero-damping, with C9	revSSB-D3 C9 TZV2PX
revSSB-D3	m-TZVP	BJ-damping, no C9	revSSB-D3 BJ TZVP
BLYP-D3	m-TZVP	Zero-damping, no C9	BLYP-D3 TZVP
BLYP-D3	m-TZVP	Zero-damping, with C9	BLYP-D3 C9 TZVP
BLYP-D3	m-TZVP	BJ-damping, no C9	BLYP-D3 BJ TZVP
mPW91LYP-D3	m-TZVP	Zero-damping, no C9	mPW91LYP-D3 TZVP
mPW91LYP-D3	m-TZVP	Zero-damping, with C9	mPW91LYP-D3 C9 TZVP
mPW91LYP-D3	m-TZV2PX	Zero-damping, with C9	mPW91LYP-D3 C9 TZV2PX
mPW91LYP-D3	m-TZVP	BJ-damping, no C9	mPW91LYP-D3 BJ TZVP
B97-D3	m-TZVP	Zero-damping, no C9	B97-D3 TZVP
B97-D3	m-TZVP	Zero-damping, with C9	B97-D3 C9 TZVP
B97-D3	m-TZV2PX	Zero-damping, with C9	B97-D3 C9 TZV2PX
B97-D3	m-TZVP	BJ-damping, no C9	B97-D3 BJ TZVP
B97-D3	m-TZVP	BJ-damping, with C9	B97-D3 BJ C9 TZVP
HCTH120-D3	m-TZVP	Zero-damping, no C9	HCTH120-D3 TZVP
HCTH120-D3	m-TZVP	Zero-damping, with C9	HCTH120-D3 C9 TZVP
HCTH120-D3	m-TZV2PX	Zero-damping, with C9	HCTH120-D3 C9 TZV2PX
HCTH120-D3	m-TZVP	BJ-damping, no C9	HCTH120-D3 BJ TZVP
HCTH407-D3	m-TZVP	Zero-damping, no C9	HCTH407-D3 TZVP
HCTH407-D3	m-TZVP	Zero-damping, with C9	HCTH407-D3 C9 TZVP
HCTH407-D3	m-TZVP	BJ-damping, no C9	HCTH407-D3 BJ TZVP
tauHCTH-D3	m-TZVP	Zero-damping, no C9	tauHCTH-D3 TZVP
tauHCTH-D3	m-TZVP	Zero-damping, with C9	tauHCTH-D3 C9 TZVP
tauHCTH-D3	m-TZV2PX	Zero-damping, with C9	tauHCTH-D3 C9 TZV2PX
tauHCTH-D3	m-TZVP	BJ-damping, no C9	tauHCTH-D3 BJ TZVP
TPSS-D3	m-TZVP	Zero-damping, no C9	TPSS-D3 TZVP
TPSS-D3	m-TZVP	Zero-damping, with C9	TPSS-D3 C9 TZVP
TPSS-D3	m-TZV2PX	Zero-damping, with C9	TPSS-D3 C9 TZV2PX
TPSS-D3	m-TZVP	BJ-damping, no C9	TPSS-D3 BJ TZVP
revTPSS-D3	m-TZVP	Zero-damping, no C9	revTPSS-D3 TZVP
revTPSS-D3	m-TZVP	Zero-damping, with C9	revTPSS-D3 C9 TZVP
vdW-DF	m-TZVP	DRSLL	vdW-DF TZVP
vdW-DF	m-TZV2PX	DRSLL	vdW-DF TZV2PX
vdW-DF-C09	m-TZVP	DRSLL	vdW-DF-C09 TZVP
vdW-DF-cx	m-TZVP	DRSLL	vdW-DF-cx TZVP
optB88-vdW	m-TZVP	DRSLL	optB88-vdW TZVP
optPBE-vdW	m-TZVP	DRSLL	optPBE-vdW TZVP
PBEkappa=1-vdW	m-TZVP	DRSLL	PBEkappa=1-vdW TZVP
optB86b-vdW	m-TZVP	DRSLL	optB86b-vdW TZVP
vdW-DF2	m-TZVP	LMKLL	vdW-DF2 TZVP
vdW-DF2	m-TZV2PX	LMKLL	vdW-DF2 TZV2PX
rev-vdW-DF2	m-TZVP	LMKLL	rev-vdW-DF2 TZVP
rev-vdW-DF2	m-TZV2PX	LMKLL	rev-vdW-DF2 TZV2PX
BEEF-vdW	m-TZVP	LMKLL	BEEF-vdW TZVP
BEEF-vdW	m-TZV2PX	LMKLL	BEEF-vdW TZV2PX
rVV10	m-TZVP	rVV10, b = 6.3	rVV10 TZVP
PBE-rVV10	m-TZVP	rVV10, b = 6.6	PBE-rVV10 TZVP
PBE-rVV10	m-TZV2PX	rVV10, b = 6.6	PBE-rVV10 TZV2PX
PBE-rVV10L	m-TZVP	rVV10, b = 10	PBE-rVV10L TZVP
PBE-rVV10L	m-TZV2PX	rVV10, b = 10	PBE-rVV10L TZV2PX
Variation of b in PBE-rVV10
PBE-rVV10	m-TZVP	rVV10, b = 9.0	PBE-rVV10 b 9.0 TZVP
PBE-rVV10	m-TZV2PX	rVV10, b = 9.0	PBE-rVV10 b 9.0 TZV2PX
PBE-rVV10	m-TZVP	rVV10, b = 8.5	PBE-rVV10 b 8.5 TZVP
PBE-rVV10	m-TZV2PX	rVV10, b = 8.5	PBE-rVV10 b 8.5 TZV2PX
PBE-rVV10	m-TZVP	rVV10, b = 8.0	PBE-rVV10 b 8.0 TZVP
PBE-rVV10	m-TZV2PX	rVV10, b = 8.0	PBE-rVV10 b 8.0 TZV2PX
PBE-rVV10	m-TZVP	rVV10, b = 7.5	PBE-rVV10 b 7.5 TZVP
PBE-rVV10	m-TZV2PX	rVV10, b = 7.5	PBE-rVV10 b 7.5 TZV2PX
Results for extra-large pore zeolites
Various functionals	m-TZVP and m-TZV2PX		Extra-large pore zeolites

## Sheet: PBE-D3 DZVP-SR
CP2K calculations - Thermochemistry of SiO2 polymorphs						Back to Overview
Settings:						Functional:
- DZVP-SR basis, Krack PPTs, cutoff 900 Ry, CELL_OPT (fixing cell symmetry)						PBE-D3, zero damping
Reference data				DFT-calculated data			Structure model			CP2K output
(from Navrotsky, Chem Rev 2009)
	FD	∆ Htrans		FD	∆ EDFT		Supercell	N(T)	Cell symmetry	Volume	EDFT
	(T atoms per 1000 Å3)	(kJ/mol per SiO2)		(T atoms per 1000 Å3)	(kJ/mol per SiO2)					(Å)	(HA)
α-quartz	26.52	0		27.0669	0		3x3x3	81	Hexagonal	2992.59	-2929.62
α-cristobalite	23.37	2.8		25.1552	4.88921		2x2x2	32	Tetragonal	1272.1	-1157.32
Tridymite	22.61	3.21		24.0957	6.58342		2x1x2	96	Monoclinic	3984.12	-3471.9
AFI	17.8	7.2		18.6163	12.2822		1x1x2	48	Hexagonal	2578.39	-1735.85
AST	17.29	10.9		19.1614	15.7256		2x2x1	80	Tetragonal	4175.07	-2892.98
BEA	15.6	9.3		15.7521	16.9425		1x1x1	64	Tetragonal	4062.96	-2314.35
CFI	18.28	8.8		18.9714	12.7116		1x3x1	96	Orthorhombic	5060.26	-3471.68
CHA	15.4	11.4		14.9031	19.199		1x1x1	36	Hexagonal	2415.61	-1301.79
FAU	13.45	13.6		13.2614	17.4615		1x1x1	192	Cubic	14478.2	-6943.01
FER	18.43	6.6		18.7631	14.7813		1x1x2	72	Orthorhombic	3837.32	-2603.7
IFR	17.03	10		17.2885	14.1117		1x1x2	64	Monoclinic	3701.88	-2314.42
ISV	15.36	14.4		15.0583	19.531		1x1x1	64	Tetragonal	4250.16	-2314.29
ITE	16.26	10.1		16.4798	16.3341		1x2x1	128	Orthorhombic	7767.08	-4628.73
MEI	14.2	13.9		14.5915	18.2541		1x1x1	34	Hexagonal	2330.13	-1229.48
MEL	17.8	8.2		18.1081	14.8327		1x1x1	96	Tetragonal	5301.49	-3471.6
MFI	17.97	6.8		18.41	12.9514		1x1x1	96	Monoclinic	5214.55	-3471.67
MTW	19.39	8.7		20.1541	10.0429		1x3x1	168	Monoclinic	8335.76	-6075.61
MWW	16.51	10.4		15.893	18.2924		1x1x1	72	Hexagonal	4530.28	-2603.61
STT	16.83	9.2		17.1471	16.518		1x1x1	64	Monoclinic	3732.42	-2314.36
				Signed errors				Unsigned errors
				FD	∆ EDFT			FD	∆ EDFT
				(T atoms per 1000 Å3)	(kJ/mol per SiO2)			(T atoms per 1000 Å3)	(kJ/mol per SiO2)
			α-quartz	0.546877				0.546877
			α-cristobalite	1.7852	2.08921			1.7852	2.08921
			Tridymite	1.48568	3.37342			1.48568	3.37342
			AFI	0.816254	5.08218			0.816254	5.08218
			AST	1.87137	4.82561			1.87137	4.82561
			BEA	0.15208	7.64248			0.15208	7.64248
			CFI	0.691367	3.91157			0.691367	3.91157
			CHA	-0.496922	7.79904			0.496922	7.79904
			FAU	-0.188648	3.8615			0.188648	3.8615
			FER	0.333072	8.18125			0.333072	8.18125
			IFR	0.258511	4.11172			0.258511	4.11172
			ISV	-0.301736	5.13096			0.301736	5.13096
			ITE	0.219819	6.23409			0.219819	6.23409
			MEI	0.391488	4.35414			0.391488	4.35414
			MEL	0.308103	6.63271			0.308103	6.63271
			MFI	0.440009	6.15141			0.440009	6.15141
			MTW	0.764134	1.34291			0.764134	1.34291
			MWW	-0.616958	7.8924			0.616958	7.8924
			STT	0.317071	7.31798			0.317071	7.31798
			MSE	0.461935	5.3297		MUE	0.630805	5.3297
								Absolute percentage error
								FD	∆ EDFT
								%	%
							α-quartz	2.06213
							α-cristobalite	7.63885	74.6147
							Tridymite	6.57089	105.091
							AFI	4.5857	70.5859
							AST	10.8234	44.2716
							BEA	0.974871	82.1772
							CFI	3.7821	44.4496
							CHA	3.22677	68.4127
							FAU	1.40259	28.3934
							FER	1.80723	123.958
							IFR	1.51797	41.1172
							ISV	1.96443	35.6317
							ITE	1.3519	61.7236
							MEI	2.75696	31.3247
							MEL	1.73092	80.8868
							MFI	2.44857	90.4619
							MTW	3.94087	15.4358
							MWW	3.73687	75.8885
							STT	1.88396	79.5433
							MAPE	3.37932	64.1093

## Sheet: PBE-D3 TZVP
CP2K calculations - Thermochemistry of SiO2 polymorphs						Back to Overview
Settings:						Functional:
- TZVP basis, Krack PPTs, cutoff 900 Ry, CELL_OPT (fixing cell symmetry)						PBE-D3, zero damping
Reference data				DFT-calculated data			Structure model			CP2K output
(from Navrotsky, Chem Rev 2009)
	FD	∆ Htrans		FD	∆ EDFT		Supercell	N(T)	Cell symmetry	Volume	EDFT
	(T atoms per 1000 Å3)	(kJ/mol per SiO2)		(T atoms per 1000 Å3)	(kJ/mol per SiO2)					(Å)	(HA)
α-quartz	26.52	0		26.2343	0		3x3x3	81	Hexagonal	3087.56	-2930.53
α-cristobalite	23.37	2.8		23.8407	2.79511		2x2x2	32	Tetragonal	1342.24	-1157.71
Tridymite	22.61	3.21		22.8875	3.72985		2x1x2	96	Monoclinic	4194.42	-3473.08
AFI	17.8	7.2		17.9767	9.02088		1x1x2	48	Hexagonal	2670.13	-1736.44
AST	17.29	10.9		17.6125	11.8659		2x2x1	80	Tetragonal	4542.23	-2893.99
BEA	15.6	9.3		15.2641	12.3203		1x1x1	64	Tetragonal	4192.84	-2315.18
CFI	18.28	8.8		18.262	9.0053		1x3x1	96	Orthorhombic	5256.8	-3472.89
CHA	15.4	11.4		14.9731	13.6262		1x1x1	36	Hexagonal	2404.31	-1302.27
FAU	13.45	13.6		13.1717	13.92		1x1x1	192	Cubic	14576.7	-6945.42
FER	18.43	6.6		18.2474	10.0963		1x1x2	72	Orthorhombic	3945.76	-2604.64
IFR	17.03	10		16.739	11.0964		1x1x2	64	Monoclinic	3823.42	-2315.21
ISV	15.36	14.4		14.8926	14.4975		1x1x1	64	Tetragonal	4297.44	-2315.13
ITE	16.26	10.1		16.021	11.7034		1x2x1	128	Orthorhombic	7989.53	-4630.39
MEI	14.2	13.9		14.4188	14.2002		1x1x1	34	Hexagonal	2358.03	-1229.91
MEL	17.8	8.2		17.2057	10.1725		1x1x1	96	Tetragonal	5579.55	-3472.85
MFI	17.97	6.8		17.8457	9.03335		1x1x1	96	Monoclinic	5379.45	-3472.89
MTW	19.39	8.7		19.3863	7.00662		1x3x1	168	Monoclinic	8665.91	-6077.68
MWW	16.51	10.4		15.8753	12.545		1x1x1	72	Hexagonal	4535.35	-2604.57
STT	16.83	9.2		16.5474	12.2243		1x1x1	64	Monoclinic	3867.67	-2315.18
				Signed errors				Unsigned errors
				FD	∆ EDFT			FD	∆ EDFT
				(T atoms per 1000 Å3)	(kJ/mol per SiO2)			(T atoms per 1000 Å3)	(kJ/mol per SiO2)
			α-quartz	-0.285728				0.285728
			α-cristobalite	0.470673	-0.00489271			0.470673	0.00489271
			Tridymite	0.277538	0.519853			0.277538	0.519853
			AFI	0.176682	1.82088			0.176682	1.82088
			AST	0.322483	0.965931			0.322483	0.965931
			BEA	-0.335866	3.02032			0.335866	3.02032
			CFI	-0.0179548	0.205302			0.0179548	0.205302
			CHA	-0.426878	2.22617			0.426878	2.22617
			FAU	-0.278313	0.319978			0.278313	0.319978
			FER	-0.182569	3.49631			0.182569	3.49631
			IFR	-0.291048	1.09641			0.291048	1.09641
			ISV	-0.467425	0.0975089			0.467425	0.0975089
			ITE	-0.239024	1.6034			0.239024	1.6034
			MEI	0.218823	0.300216			0.218823	0.300216
			MEL	-0.594306	1.97252			0.594306	1.97252
			MFI	-0.124313	2.23335			0.124313	2.23335
			MTW	-0.00368672	-1.69338			0.00368672	1.69338
			MWW	-0.634724	2.145			0.634724	2.145
			STT	-0.282554	3.02427			0.282554	3.02427
			MSE	-0.14201	1.29718		MUE	0.296347	1.48587
								Absolute percentage error
								FD	∆ EDFT
								%	%
							α-quartz	1.07741
							α-cristobalite	2.014	0.17474
							Tridymite	1.2275	16.1948
							AFI	0.992595	25.29
							AST	1.86514	8.86175
							BEA	2.15299	32.4766
							CFI	0.0982208	2.33298
							CHA	2.77193	19.5278
							FAU	2.06924	2.35278
							FER	0.990609	52.9745
							IFR	1.70903	10.9641
							ISV	3.04313	0.677145
							ITE	1.47001	15.8752
							MEI	1.54101	2.15982
							MEL	3.3388	24.0551
							MFI	0.691783	32.8434
							MTW	0.0190135	19.4642
							MWW	3.84448	20.625
							STT	1.67887	32.8725
							MAPE	1.71557	17.7624

## Sheet: PBE-D3 TZV2P
CP2K calculations - Thermochemistry of SiO2 polymorphs						Back to Overview
Settings:						Functional:
- TZV2PX basis, Krack PPTs, cutoff 900 Ry, CELL_OPT (fixing cell symmetry)						PBE-D3, zero damping
Reference data				DFT-calculated data			Structure model			CP2K output
(from Navrotsky, Chem Rev 2009)
	FD	∆ Htrans		FD	∆ EDFT		Supercell	N(T)	Cell symmetry	Volume	EDFT
	(T atoms per 1000 Å3)	(kJ/mol per SiO2)		(T atoms per 1000 Å3)	(kJ/mol per SiO2)					(Å)	(HA)
α-quartz	26.52	0		26.7225	0		3x3x3	81	Hexagonal	3031.15	-2930.87
α-cristobalite	23.37	2.8		24.3848	2.87542		2x2x2	32	Tetragonal	1312.29	-1157.84
Tridymite	22.61	3.21		23.5521	4.21689		2x1x2	96	Monoclinic	4076.07	-3473.47
AFI	17.8	7.2		18.4531	9.16592		1x1x2	48	Hexagonal	2601.19	-1736.64
AST	17.29	10.9		18.464	12.3843		2x2x1	80	Tetragonal	4332.75	-2894.31
BEA	15.6	9.3		15.5944	13.4915		1x1x1	64	Tetragonal	4104.04	-2315.42
CFI	18.28	8.8		18.6607	9.84602		1x3x1	96	Orthorhombic	5144.49	-3473.26
CHA	15.4	11.4		15.0934	14.619		1x1x1	36	Hexagonal	2385.14	-1302.41
FAU	13.45	13.6		13.3377	13.9956		1x1x1	192	Cubic	14395.3	-6946.23
FER	18.43	6.6		18.6483	11.4615		1x1x2	72	Orthorhombic	3860.95	-2604.9
IFR	17.03	10		17.1853	11.2903		1x1x2	64	Monoclinic	3724.12	-2315.47
ISV	15.36	14.4		15.0649	15.742		1x1x1	64	Tetragonal	4248.28	-2315.37
ITE	16.26	10.1		16.2963	12.6776		1x2x1	128	Orthorhombic	7854.56	-4630.88
MEI	14.2	13.9		14.6425	14.4421		1x1x1	34	Hexagonal	2322	-1230.05
MEL	17.8	8.2		17.4932	11.7571		1x1x1	96	Tetragonal	5487.85	-3473.19
MFI	17.97	6.8		18.2686	9.88028		1x1x1	96	Monoclinic	5254.93	-3473.26
MTW	19.39	8.7		19.8517	7.39201		1x3x1	168	Monoclinic	8462.74	-6078.37
MWW	16.51	10.4		16.0191	14.1325		1x1x1	72	Hexagonal	4494.62	-2604.83
STT	16.83	9.2		16.9643	13.1128		1x1x1	64	Monoclinic	3772.63	-2315.43
				Signed errors				Unsigned errors
				FD	∆ EDFT			FD	∆ EDFT
				(T atoms per 1000 Å3)	(kJ/mol per SiO2)			(T atoms per 1000 Å3)	(kJ/mol per SiO2)
			α-quartz	0.202495				0.202495
			α-cristobalite	1.01483	0.0754205			1.01483	0.0754205
			Tridymite	0.94211	1.00689			0.94211	1.00689
			AFI	0.653061	1.96592			0.653061	1.96592
			AST	1.17401	1.48429			1.17401	1.48429
			BEA	-0.00562042	4.19149			0.00562042	4.19149
			CFI	0.380733	1.04602			0.380733	1.04602
			CHA	-0.306576	3.21905			0.306576	3.21905
			FAU	-0.112303	0.395623			0.112303	0.395623
			FER	0.218279	4.86154			0.218279	4.86154
			IFR	0.155269	1.29033			0.155269	1.29033
			ISV	-0.295084	1.34197			0.295084	1.34197
			ITE	0.0362687	2.57765			0.0362687	2.57765
			MEI	0.44252	0.542099			0.44252	0.542099
			MEL	-0.306822	3.55712			0.306822	3.55712
			MFI	0.298553	3.08028			0.298553	3.08028
			MTW	0.461738	-1.30799			0.461738	1.30799
			MWW	-0.490858	3.73249			0.490858	3.73249
			STT	0.134312	3.91282			0.134312	3.91282
			MSE	0.241943	2.05406		MUE	0.401655	2.19939
								Absolute percentage error
								FD	∆ EDFT
								%	%
							α-quartz	0.763556
							α-cristobalite	4.34247	2.69359
							Tridymite	4.16679	31.3673
							AFI	3.66888	27.3045
							AST	6.7901	13.6174
							BEA	0.0360284	45.0697
							CFI	2.08278	11.8866
							CHA	1.99075	28.2373
							FAU	0.83497	2.90899
							FER	1.18437	73.6597
							IFR	0.911738	12.9033
							ISV	1.92112	9.31922
							ITE	0.223055	25.5213
							MEI	3.11634	3.9
							MEL	1.72372	43.3796
							MFI	1.6614	45.2982
							MTW	2.38132	15.0344
							MWW	2.97309	35.8893
							STT	0.79805	42.5307
							MAPE	2.18792	26.1401

## Sheet: PBE-D3 TZV2PX
CP2K calculations - Thermochemistry of SiO2 polymorphs						Back to Overview
Settings:						Functional:
- TZV2PX basis, Krack PPTs, cutoff 900 Ry, CELL_OPT (fixing cell symmetry)						PBE-D3, zero damping
Reference data				DFT-calculated data			Structure model			CP2K output
(from Navrotsky, Chem Rev 2009)
	FD	∆ Htrans		FD	∆ EDFT		Supercell	N(T)	Cell symmetry	Volume	EDFT
	(T atoms per 1000 Å3)	(kJ/mol per SiO2)		(T atoms per 1000 Å3)	(kJ/mol per SiO2)					(Å)	(HA)
α-quartz	26.52	0		26.1076	0		3x3x3	81	Hexagonal	3102.54	-2931.74
α-cristobalite	23.37	2.8		23.4843	2.85627		2x2x2	32	Tetragonal	1362.61	-1158.18
Tridymite	22.61	3.21		22.6575	3.47033		2x1x2	96	Monoclinic	4237.02	-3474.53
AFI	17.8	7.2		17.7744	8.67535		1x1x2	48	Hexagonal	2700.51	-1737.17
AST	17.29	10.9		17.4624	11.1199		2x2x1	80	Tetragonal	4581.27	-2895.2
BEA	15.6	9.3		15.2689	11.4358		1x1x1	64	Tetragonal	4191.53	-2316.16
CFI	18.28	8.8		18.0664	8.45846		1x3x1	96	Orthorhombic	5313.74	-3474.34
CHA	15.4	11.4		15.0742	12.7882		1x1x1	36	Hexagonal	2388.18	-1302.82
FAU	13.45	13.6		13.1834	13.7372		1x1x1	192	Cubic	14563.7	-6948.3
FER	18.43	6.6		18.2075	9.17296		1x1x2	72	Orthorhombic	3954.42	-2605.74
IFR	17.03	10		16.7615	10.6647		1x1x2	64	Monoclinic	3818.27	-2316.17
ISV	15.36	14.4		14.9097	13.6111		1x1x1	64	Tetragonal	4292.5	-2316.1
ITE	16.26	10.1		15.9679	10.8961		1x2x1	128	Orthorhombic	8016.06	-4632.34
MEI	14.2	13.9		14.4427	13.7499		1x1x1	34	Hexagonal	2354.13	-1230.43
MEL	17.8	8.2		17.2309	9.12631		1x1x1	96	Tetragonal	5571.38	-3474.32
MFI	17.97	6.8		17.7601	8.3842		1x1x1	96	Monoclinic	5405.36	-3474.35
MTW	19.39	8.7		19.2412	6.68917		1x3x1	168	Monoclinic	8731.27	-6080.21
MWW	16.51	10.4		15.9506	11.4567		1x1x1	72	Hexagonal	4513.94	-2605.67
STT	16.83	9.2		16.4898	11.3894		1x1x1	64	Monoclinic	3881.19	-2316.16
				Signed errors				Unsigned errors
				FD	∆ EDFT			FD	∆ EDFT
				(T atoms per 1000 Å3)	(kJ/mol per SiO2)			(T atoms per 1000 Å3)	(kJ/mol per SiO2)
			α-quartz	-0.412378				0.412378
			α-cristobalite	0.114318	0.0562743			0.114318	0.0562743
			Tridymite	0.0474542	0.260331			0.0474542	0.260331
			AFI	-0.0256121	1.47535			0.0256121	1.47535
			AST	0.172425	0.219922			0.172425	0.219922
			BEA	-0.33111	2.13582			0.33111	2.13582
			CFI	-0.213639	-0.341543			0.213639	0.341543
			CHA	-0.325783	1.38817			0.325783	1.38817
			FAU	-0.266551	0.1372			0.266551	0.1372
			FER	-0.222525	2.57296			0.222525	2.57296
			IFR	-0.26849	0.66471			0.26849	0.66471
			ISV	-0.450274	-0.788863			0.450274	0.788863
			ITE	-0.292051	0.796099			0.292051	0.796099
			MEI	0.242696	-0.150057			0.242696	0.150057
			MEL	-0.569087	0.926307			0.569087	0.926307
			MFI	-0.209859	1.5842			0.209859	1.5842
			MTW	-0.148803	-2.01083			0.148803	2.01083
			MWW	-0.559421	1.05673			0.559421	1.05673
			STT	-0.340194	2.18943			0.340194	2.18943
			MSE	-0.213625	0.676234		MUE	0.274351	1.04193
								Absolute percentage error
								FD	∆ EDFT
								%	%
							α-quartz	1.55497
							α-cristobalite	0.489164	2.0098
							Tridymite	0.209881	8.11001
							AFI	0.143888	20.4909
							AST	0.997255	2.01763
							BEA	2.1225	22.9658
							CFI	1.1687	3.88117
							CHA	2.11547	12.177
							FAU	1.98179	1.00882
							FER	1.20741	38.9843
							IFR	1.57657	6.6471
							ISV	2.93147	5.47822
							ITE	1.79613	7.88217
							MEI	1.70913	1.07955
							MEL	3.19712	11.2964
							MFI	1.16783	23.2971
							MTW	0.767421	23.113
							MWW	3.38838	10.1608
							STT	2.02135	23.7982
							MAPE	1.60771	12.4666

## Sheet: PBE-D3 C9 TZVP
CP2K calculations - Thermochemistry of SiO2 polymorphs						Back to Overview
Settings:						Functional:
- TZVP basis, Krack PPTs, cutoff 900 Ry, CELL_OPT (fixing cell symmetry)						PBE-D3, zero damping
						Inlcuding C9 term
Reference data				DFT-calculated data			Structure model			CP2K output
(from Navrotsky, Chem Rev 2009)
	FD	∆ Htrans		FD	∆ EDFT		Supercell	N(T)	Cell symmetry	Volume	EDFT
	(T atoms per 1000 Å3)	(kJ/mol per SiO2)		(T atoms per 1000 Å3)	(kJ/mol per SiO2)					(Å)	(HA)
α-quartz	26.52	0		26.1397	0		3x3x3	81	Hexagonal	3098.73	-2930.47
α-cristobalite	23.37	2.8		23.7676	2.4711		2x2x2	32	Tetragonal	1346.37	-1157.68
Tridymite	22.61	3.21		22.7644	3.27396		2x1x2	96	Monoclinic	4217.11	-3473.03
AFI	17.8	7.2		17.9488	7.99753		1x1x2	48	Hexagonal	2674.28	-1736.43
AST	17.29	10.9		17.5575	10.6729		2x2x1	80	Tetragonal	4556.46	-2893.96
BEA	15.6	9.3		15.2541	11.0672		1x1x1	64	Tetragonal	4195.6	-2315.16
CFI	18.28	8.8		18.191	8.04181		1x3x1	96	Orthorhombic	5277.35	-3472.85
CHA	15.4	11.4		14.9656	12.2084		1x1x1	36	Hexagonal	2405.51	-1302.26
FAU	13.45	13.6		13.1649	12.4693		1x1x1	192	Cubic	14584.3	-6945.38
FER	18.43	6.6		18.2193	9.01748		1x1x2	72	Orthorhombic	3951.84	-2604.61
IFR	17.03	10		16.7194	9.89636		1x1x2	64	Monoclinic	3827.88	-2315.19
ISV	15.36	14.4		14.8835	13.1967		1x1x1	64	Tetragonal	4300.07	-2315.11
ITE	16.26	10.1		16.0047	10.419		1x2x1	128	Orthorhombic	7997.66	-4630.35
MEI	14.2	13.9		14.4096	12.8078		1x1x1	34	Hexagonal	2359.55	-1229.91
MEL	17.8	8.2		17.18	9.05622		1x1x1	96	Tetragonal	5587.89	-3472.81
MFI	17.97	6.8		17.8239	7.97627		1x1x1	96	Monoclinic	5386.01	-3472.85
MTW	19.39	8.7		19.3216	6.14036		1x3x1	168	Monoclinic	8694.91	-6077.61
MWW	16.51	10.4		15.8665	11.3092		1x1x1	72	Hexagonal	4537.86	-2604.55
STT	16.83	9.2		16.5241	10.9964		1x1x1	64	Monoclinic	3873.13	-2315.16
				Signed errors				Unsigned errors
				FD	∆ EDFT			FD	∆ EDFT
				(T atoms per 1000 Å3)	(kJ/mol per SiO2)			(T atoms per 1000 Å3)	(kJ/mol per SiO2)
			α-quartz	-0.380279				0.380279
			α-cristobalite	0.397565	-0.328897			0.397565	0.328897
			Tridymite	0.154385	0.0639649			0.154385	0.0639649
			AFI	0.148759	0.797525			0.148759	0.797525
			AST	0.2675	-0.227131			0.2675	0.227131
			BEA	-0.34591	1.76716			0.34591	1.76716
			CFI	-0.0890442	-0.758189			0.0890442	0.758189
			CHA	-0.434383	0.808377			0.434383	0.808377
			FAU	-0.285131	-1.13074			0.285131	1.13074
			FER	-0.210653	2.41748			0.210653	2.41748
			IFR	-0.31057	-0.10364			0.31057	0.10364
			ISV	-0.476509	-1.20333			0.476509	1.20333
			ITE	-0.255314	0.318965			0.255314	0.318965
			MEI	0.209557	-1.09224			0.209557	1.09224
			MEL	-0.620001	0.856215			0.620001	0.856215
			MFI	-0.146059	1.17627			0.146059	1.17627
			MTW	-0.0683567	-2.55964			0.0683567	2.55964
			MWW	-0.643505	0.909182			0.643505	0.909182
			STT	-0.305912	1.79638			0.305912	1.79638
			MSE	-0.178624	0.194873		MUE	0.3026	1.01752
								Absolute percentage error
								FD	∆ EDFT
								%	%
							α-quartz	1.43393
							α-cristobalite	1.70118	11.7463
							Tridymite	0.682816	1.99268
							AFI	0.835724	11.0767
							AST	1.54714	2.08377
							BEA	2.21737	19.0017
							CFI	0.487113	8.61578
							CHA	2.82067	7.09102
							FAU	2.11994	8.31423
							FER	1.14299	36.6285
							IFR	1.82366	1.0364
							ISV	3.10227	8.35647
							ITE	1.5702	3.15807
							MEI	1.47575	7.85787
							MEL	3.48315	10.4416
							MFI	0.812796	17.298
							MTW	0.352536	29.4211
							MWW	3.89767	8.74214
							STT	1.81766	19.5258
							MAPE	1.75392	11.7994

## Sheet: PBE-D3 C9 TZV2PX
CP2K calculations - Thermochemistry of SiO2 polymorphs						Back to Overview
Settings:						Functional:
- TZV2PX basis, Krack PPTs, cutoff 900 Ry, CELL_OPT (fixing cell symmetry)						PBE-D3, zero damping
						Inlcuding C9 term
Reference data				DFT-calculated data			Structure model			CP2K output
(from Navrotsky, Chem Rev 2009)
	FD	∆ Htrans		FD	∆ EDFT		Supercell	N(T)	Cell symmetry	Volume	EDFT
	(T atoms per 1000 Å3)	(kJ/mol per SiO2)		(T atoms per 1000 Å3)	(kJ/mol per SiO2)					(Å)	(HA)
α-quartz	26.52	0		25.9934	0		3x3x3	81	Hexagonal	3116.17	-2931.68
α-cristobalite	23.37	2.8		23.3211	2.50365		2x2x2	32	Tetragonal	1372.15	-1158.16
Tridymite	22.61	3.21		22.5214	3.00241		2x1x2	96	Monoclinic	4262.62	-3474.47
AFI	17.8	7.2		17.7395	7.65154		1x1x2	48	Hexagonal	2705.82	-1737.15
AST	17.29	10.9		17.361	9.92631		2x2x1	80	Tetragonal	4608.03	-2895.18
BEA	15.6	9.3		15.2604	10.2045		1x1x1	64	Tetragonal	4193.85	-2316.14
CFI	18.28	8.8		18.032	7.49838		1x3x1	96	Orthorhombic	5323.87	-3474.31
CHA	15.4	11.4		15.0671	11.398		1x1x1	36	Hexagonal	2389.31	-1302.81
FAU	13.45	13.6		13.1756	12.3043		1x1x1	192	Cubic	14572.3	-6948.26
FER	18.43	6.6		18.1762	8.11044		1x1x2	72	Orthorhombic	3961.21	-2605.71
IFR	17.03	10		16.7412	9.4869		1x1x2	64	Monoclinic	3822.9	-2316.16
ISV	15.36	14.4		14.9002	12.3318		1x1x1	64	Tetragonal	4295.26	-2316.09
ITE	16.26	10.1		15.9288	9.63384		1x2x1	128	Orthorhombic	8035.77	-4632.3
MEI	14.2	13.9		14.4318	12.379		1x1x1	34	Hexagonal	2355.91	-1230.42
MEL	17.8	8.2		17.212	8.03659		1x1x1	96	Tetragonal	5577.52	-3474.29
MFI	17.97	6.8		17.7292	7.33759		1x1x1	96	Monoclinic	5414.78	-3474.31
MTW	19.39	8.7		19.1746	5.82776		1x3x1	168	Monoclinic	8761.59	-6080.14
MWW	16.51	10.4		15.9416	10.2474		1x1x1	72	Hexagonal	4516.47	-2605.65
STT	16.83	9.2		16.4744	10.1763		1x1x1	64	Monoclinic	3884.82	-2316.14
				Signed errors				Unsigned errors
				FD	∆ EDFT			FD	∆ EDFT
				(T atoms per 1000 Å3)	(kJ/mol per SiO2)			(T atoms per 1000 Å3)	(kJ/mol per SiO2)
			α-quartz	-0.526576				0.526576
			α-cristobalite	-0.0488904	-0.296352			0.0488904	0.296352
			Tridymite	-0.0886318	-0.207595			0.0886318	0.207595
			AFI	-0.0604934	0.451537			0.0604934	0.451537
			AST	0.0709896	-0.973695			0.0709896	0.973695
			BEA	-0.339556	0.904524			0.339556	0.904524
			CFI	-0.248015	-1.30162			0.248015	1.30162
			CHA	-0.332883	-0.00198106			0.332883	0.00198106
			FAU	-0.274352	-1.29573			0.274352	1.29573
			FER	-0.253753	1.51044			0.253753	1.51044
			IFR	-0.288787	-0.5131			0.288787	0.5131
			ISV	-0.459844	-2.06824			0.459844	2.06824
			ITE	-0.331224	-0.46616			0.331224	0.46616
			MEI	0.23177	-1.52099			0.23177	1.52099
			MEL	-0.588046	-0.163406			0.588046	0.163406
			MFI	-0.240764	0.537594			0.240764	0.537594
			MTW	-0.215405	-2.87224			0.215405	2.87224
			MWW	-0.568361	-0.152558			0.568361	0.152558
			STT	-0.355631	0.976271			0.355631	0.976271
			MSE	-0.258866	-0.414072		MUE	0.290735	0.900779
								Absolute percentage error
								FD	∆ EDFT
								%	%
							α-quartz	1.98558
							α-cristobalite	0.209201	10.584
							Tridymite	0.392003	6.46712
							AFI	0.339851	6.27135
							AST	0.410582	8.93298
							BEA	2.17664	9.72606
							CFI	1.35676	14.7912
							CHA	2.16158	0.0173777
							FAU	2.03979	9.5274
							FER	1.37685	22.8854
							IFR	1.69575	5.131
							ISV	2.99378	14.3628
							ITE	2.03705	4.61545
							MEI	1.63219	10.9424
							MEL	3.30363	1.99275
							MFI	1.33981	7.90579
							MTW	1.11091	33.0142
							MWW	3.44253	1.4669
							STT	2.11308	10.6116
							MAPE	1.6904	9.9581

## Sheet: PBE-D3 BJ TZVP
CP2K calculations - Thermochemistry of SiO2 polymorphs						Back to Overview
Settings:						Functional:
- TZVP basis, Krack PPTs, cutoff 900 Ry, CELL_OPT (fixing cell symmetry)						PBE-D3, Becke-Johnson damping
Reference data				DFT-calculated data			Structure model			CP2K output
(from Navrotsky, Chem Rev 2009)
	FD	∆ Htrans		FD	∆ EDFT		Supercell	N(T)	Cell symmetry	Volume	EDFT
	(T atoms per 1000 Å3)	(kJ/mol per SiO2)		(T atoms per 1000 Å3)	(kJ/mol per SiO2)					(Å)	(HA)
α-quartz	26.52	0		26.6297	0		3x3x3	81	Hexagonal	3041.72	-2930.91
α-cristobalite	23.37	2.8		24.0735	3.84496		2x2x2	32	Tetragonal	1329.26	-1157.84
Tridymite	22.61	3.21		23.1999	4.97333		2x1x2	96	Monoclinic	4137.95	-3473.49
AFI	17.8	7.2		18.0911	10.225		1x1x2	48	Hexagonal	2653.24	-1736.65
AST	17.29	10.9		18.0206	13.1744		2x2x1	80	Tetragonal	4439.36	-2894.32
BEA	15.6	9.3		15.3566	13.6444		1x1x1	64	Tetragonal	4167.6	-2315.45
CFI	18.28	8.8		18.4451	10.2048		1x3x1	96	Orthorhombic	5204.62	-3473.29
CHA	15.4	11.4		15.0087	15.131		1x1x1	36	Hexagonal	2398.62	-1302.42
FAU	13.45	13.6		13.2151	15.2095		1x1x1	192	Cubic	14528.9	-6946.22
FER	18.43	6.6		18.4189	11.3335		1x1x2	72	Orthorhombic	3909.03	-2604.94
IFR	17.03	10		16.9399	12.1953		1x1x2	64	Monoclinic	3778.07	-2315.48
ISV	15.36	14.4		14.9519	15.756		1x1x1	64	Tetragonal	4280.39	-2315.39
ITE	16.26	10.1		16.1221	13.1083		1x2x1	128	Orthorhombic	7939.4	-4630.92
MEI	14.2	13.9		14.477	15.5002		1x1x1	34	Hexagonal	2348.56	-1230.06
MEL	17.8	8.2		17.2808	11.635		1x1x1	96	Tetragonal	5555.29	-3473.24
MFI	17.97	6.8		18.0187	10.252		1x1x1	96	Monoclinic	5327.79	-3473.29
MTW	19.39	8.7		19.6064	8.11312		1x3x1	168	Monoclinic	8568.62	-6078.4
MWW	16.51	10.4		15.9231	13.9244		1x1x1	72	Hexagonal	4521.73	-2604.87
STT	16.83	9.2		16.7172	13.538		1x1x1	64	Monoclinic	3828.38	-2315.45
				Signed errors				Unsigned errors
				FD	∆ EDFT			FD	∆ EDFT
				(T atoms per 1000 Å3)	(kJ/mol per SiO2)			(T atoms per 1000 Å3)	(kJ/mol per SiO2)
			α-quartz	0.109711				0.109711
			α-cristobalite	0.703528	1.04496			0.703528	1.04496
			Tridymite	0.589895	1.76333			0.589895	1.76333
			AFI	0.291069	3.02499			0.291069	3.02499
			AST	0.73063	2.27443			0.73063	2.27443
			BEA	-0.243437	4.34439			0.243437	4.34439
			CFI	0.165142	1.40481			0.165142	1.40481
			CHA	-0.391345	3.731			0.391345	3.731
			FAU	-0.234935	1.60949			0.234935	1.60949
			FER	-0.0111307	4.73354			0.0111307	4.73354
			IFR	-0.0901414	2.19533			0.0901414	2.19533
			ISV	-0.408083	1.35596			0.408083	1.35596
			ITE	-0.137879	3.00831			0.137879	3.00831
			MEI	0.276962	1.60021			0.276962	1.60021
			MEL	-0.519177	3.43496			0.519177	3.43496
			MFI	0.0487164	3.45196			0.0487164	3.45196
			MTW	0.216423	-0.586881			0.216423	0.586881
			MWW	-0.586885	3.52438			0.586885	3.52438
			STT	-0.112762	4.33805			0.112762	4.33805
			MSE	0.0208581	2.56962		MUE	0.308834	2.63483
								Absolute percentage error
								FD	∆ EDFT
								%	%
							α-quartz	0.413693
							α-cristobalite	3.01039	37.3202
							Tridymite
							AFI	1.63522	42.0137
							AST	4.22574	20.8663
							BEA	1.56049	46.7139
							CFI	0.903404	15.9638
							CHA	2.5412	32.7281
							FAU	1.74673	11.8345
							FER	0.0603942	71.7204
							IFR	0.52931	21.9533
							ISV	2.65679	9.4164
							ITE	0.847963	29.7853
							MEI	1.95044	11.5123
							MEL	2.91672	41.8897
							MFI	0.271098	50.7641
							MTW	1.11616	6.74576
							MWW	3.55473	33.8883
							STT	0.670008	47.1527
							MAPE	1.70058	31.3099

## Sheet: PBE-D3 BJ C9 TZVP
CP2K calculations - Thermochemistry of SiO2 polymorphs						Back to Overview
Settings:						Functional:
- TZVP basis, Krack PPTs, cutoff 900 Ry, CELL_OPT (fixing cell symmetry)						PBE-D3, Becke-Johnson damping
						Inlcuding C9 term
Reference data				DFT-calculated data			Structure model			CP2K output
(from Navrotsky, Chem Rev 2009)
	FD	∆ Htrans		FD	∆ EDFT		Supercell	N(T)	Cell symmetry	Volume	EDFT
	(T atoms per 1000 Å3)	(kJ/mol per SiO2)		(T atoms per 1000 Å3)	(kJ/mol per SiO2)					(Å)	(HA)
α-quartz	26.52	0		26.5169	0		3x3x3	81	Hexagonal	3054.65	-2930.84
α-cristobalite	23.37	2.8		23.9776	3.49312		2x2x2	32	Tetragonal	1334.58	-1157.82
Tridymite	22.61	3.21		23.0491	4.50252		2x1x2	96	Monoclinic	4165.03	-3473.43
AFI	17.8	7.2		18.0603	9.15612		1x1x2	48	Hexagonal	2657.77	-1736.63
AST	17.29	10.9		17.8677	11.9772		2x2x1	80	Tetragonal	4477.36	-2894.3
BEA	15.6	9.3		15.3434	12.3417		1x1x1	64	Tetragonal	4171.17	-2315.43
CFI	18.28	8.8		18.4191	9.20674		1x3x1	96	Orthorhombic	5211.99	-3473.26
CHA	15.4	11.4		14.9892	13.6493		1x1x1	36	Hexagonal	2401.74	-1302.41
FAU	13.45	13.6		13.2077	13.7057		1x1x1	192	Cubic	14537	-6946.18
FER	18.43	6.6		18.3505	10.2177		1x1x2	72	Orthorhombic	3923.6	-2604.91
IFR	17.03	10		16.9182	10.9558		1x1x2	64	Monoclinic	3782.91	-2315.46
ISV	15.36	14.4		14.9421	14.403		1x1x1	64	Tetragonal	4283.2	-2315.38
ITE	16.26	10.1		16.0993	11.7751		1x2x1	128	Orthorhombic	7950.66	-4630.88
MEI	14.2	13.9		14.4662	14.055		1x1x1	34	Hexagonal	2350.31	-1230.05
MEL	17.8	8.2		17.6932	9.93737		1x1x1	96	Tetragonal	5425.82	-3473.23
MFI	17.97	6.8		17.9839	9.15355		1x1x1	96	Monoclinic	5338.12	-3473.26
MTW	19.39	8.7		19.5405	7.21297		1x3x1	168	Monoclinic	8597.54	-6078.33
MWW	16.51	10.4		15.9139	12.6358		1x1x1	72	Hexagonal	4524.34	-2604.85
STT	16.83	9.2		16.6841	12.2696		1x1x1	64	Monoclinic	3835.99	-2315.43
				Signed errors				Unsigned errors
				FD	∆ EDFT			FD	∆ EDFT
				(T atoms per 1000 Å3)	(kJ/mol per SiO2)			(T atoms per 1000 Å3)	(kJ/mol per SiO2)
			α-quartz	-0.0030635				0.0030635
			α-cristobalite	0.607616	0.693118			0.607616	0.693118
			Tridymite	0.439072	1.29252			0.439072	1.29252
			AFI	0.260284	1.95612			0.260284	1.95612
			AST	0.577659	1.07722			0.577659	1.07722
			BEA	-0.256583	3.04166			0.256583	3.04166
			CFI	0.139053	0.406739			0.139053	0.406739
			CHA	-0.410839	2.24933			0.410839	2.24933
			FAU	-0.242322	0.105665			0.242322	0.105665
			FER	-0.079507	3.61771			0.079507	3.61771
			IFR	-0.111794	0.955754			0.111794	0.955754
			ISV	-0.417906	0.00297692			0.417906	0.00297692
			ITE	-0.160715	1.67514			0.160715	1.67514
			MEI	0.266184	0.154994			0.266184	0.154994
			MEL	-0.106837	1.73737			0.106837	1.73737
			MFI	0.0138729	2.35355			0.0138729	2.35355
			MTW	0.150469	-1.48703			0.150469	1.48703
			MWW	-0.596081	2.23582			0.596081	2.23582
			STT	-0.145892	3.06955			0.145892	3.06955
			MSE	-0.00407002	1.39657		MUE	0.262408	1.56179
								Absolute percentage error
								FD	∆ EDFT
								%	%
							α-quartz	0.0115517
							α-cristobalite	2.59998	24.7542
							Tridymite
							AFI	1.46227	27.1683
							AST	3.341	9.88278
							BEA	1.64476	32.706
							CFI	0.760686	4.62203
							CHA	2.66779	19.731
							FAU	1.80165	0.776945
							FER	0.4314	54.8139
							IFR	0.656454	9.55754
							ISV	2.72075	0.0206731
							ITE	0.98841	16.5856
							MEI	1.87453	1.11507
							MEL	0.600209	21.1875
							MFI	0.0772003	34.611
							MTW	0.776013	17.0923
							MWW	3.61043	21.4983
							STT	0.866858	33.3647
							MAPE	1.494	19.3816

## Sheet: PBEsol-D3 TZVP
CP2K calculations - Thermochemistry of SiO2 polymorphs						Back to Overview
Settings:						Functional:
- TZVP basis, Krack PPTs, cutoff 900 Ry, CELL_OPT (fixing cell symmetry)						PBEsol-D3, zero damping
Reference data				DFT-calculated data			Structure model			CP2K output
(from Navrotsky, Chem Rev 2009)
	FD	∆ Htrans		FD	∆ EDFT		Supercell	N(T)	Cell symmetry	Volume	EDFT
	(T atoms per 1000 Å3)	(kJ/mol per SiO2)		(T atoms per 1000 Å3)	(kJ/mol per SiO2)					(Å)	(HA)
α-quartz	26.52	0		27.0433	0		3x3x3	81	Hexagonal	2995.2	-2921.38
α-cristobalite	23.37	2.8		23.9742	3.98844		2x2x2	32	Tetragonal	1334.77	-1154.08
Tridymite	22.61	3.21		23.2599	4.87609		2x1x2	96	Monoclinic	4127.27	-3462.2
AFI	17.8	7.2		18.1248	9.52984		1x1x2	48	Hexagonal	2648.31	-1731.02
AST	17.29	10.9		17.8843	12.0648		2x2x1	80	Tetragonal	4473.19	-2884.95
BEA	15.6	9.3		15.2215	12.7949		1x1x1	64	Tetragonal	4204.59	-2307.94
CFI	18.28	8.8		18.4497	9.48768		1x3x1	96	Orthorhombic	5203.33	-3462.03
CHA	15.4	11.4		15.0159	13.6243		1x1x1	36	Hexagonal	2397.46	-1298.21
FAU	13.45	13.6		13.2197	13.5462		1x1x1	192	Cubic	14523.8	-6923.77
FER	18.43	6.6		18.4713	10.6095		1x1x2	72	Orthorhombic	3897.94	-2596.49
IFR	17.03	10		16.8584	11.2404		1x1x2	64	Monoclinic	3796.34	-2307.98
ISV	15.36	14.4		14.9697	14.3698		1x1x1	64	Tetragonal	4275.31	-2307.9
ITE	16.26	10.1		16.1919	11.8115		1x2x1	128	Orthorhombic	7905.18	-4615.93
MEI	14.2	13.9		14.4813	13.9454		1x1x1	34	Hexagonal	2347.85	-1226.08
MEL	17.8	8.2		17.265	10.9711		1x1x1	96	Tetragonal	5560.38	-3461.98
MFI	17.97	6.8		18.0842	9.47156		1x1x1	96	Monoclinic	5308.5	-3462.03
MTW	19.39	8.7		19.7456	7.41416		1x3x1	168	Monoclinic	8508.24	-6058.69
MWW	16.51	10.4		15.9108	13.009		1x1x1	72	Hexagonal	4525.24	-2596.43
STT	16.83	9.2		16.7236	12.2713		1x1x1	64	Monoclinic	3826.94	-2307.95
				Signed errors				Unsigned errors
				FD	∆ EDFT			FD	∆ EDFT
				(T atoms per 1000 Å3)	(kJ/mol per SiO2)			(T atoms per 1000 Å3)	(kJ/mol per SiO2)
			α-quartz	0.523275				0.523275
			α-cristobalite	0.604179	1.18844			0.604179	1.18844
			Tridymite	0.649914	1.66609			0.649914	1.66609
			AFI	0.324795	2.32984			0.324795	2.32984
			AST	0.594329	1.1648			0.594329	1.1648
			BEA	-0.378533	3.49486			0.378533	3.49486
			CFI	0.169726	0.687679			0.169726	0.687679
			CHA	-0.38413	2.2243			0.38413	2.2243
			FAU	-0.230279	-0.05376			0.230279	0.05376
			FER	0.0412989	4.00947			0.0412989	4.00947
			IFR	-0.171644	1.24036			0.171644	1.24036
			ISV	-0.390327	-0.0301625			0.390327	0.0301625
			ITE	-0.0680832	1.71151			0.0680832	1.71151
			MEI	0.281331	0.0453885			0.281331	0.0453885
			MEL	-0.535	2.77113			0.535	2.77113
			MFI	0.11419	2.67156			0.11419	2.67156
			MTW	0.355568	-1.28584			0.355568	1.28584
			MWW	-0.599241	2.60902			0.599241	2.60902
			STT	-0.106449	3.07135			0.106449	3.07135
			MSE	0.0418378	1.63978		MUE	0.343279	1.79198
								Absolute percentage error
								FD	∆ EDFT
								%	%
							α-quartz	1.97313
							α-cristobalite	2.58528	42.4442
							Tridymite	2.87446	51.9031
							AFI	1.82469	32.3589
							AST	3.43741	10.6862
							BEA	2.42649	37.5791
							CFI	0.928481	7.81453
							CHA	2.49435	19.5114
							FAU	1.71211	0.395294
							FER	0.224085	60.7495
							IFR	1.00789	12.4036
							ISV	2.54119	0.209462
							ITE	0.418716	16.9457
							MEI	1.9812	0.326536
							MEL	3.00562	33.7943
							MFI	0.635446	39.2876
							MTW	1.83377	14.7797
							MWW	3.62956	25.0867
							STT	0.632497	33.3842
							MAPE	1.90349	24.4256

[truncated: 75 more sheets: PBEsol-D3 C9 TZVP, PBEsol-D3 C9 TZV2PX, PBEsol-D3 BJ TZVP, revPBE-D3 TZVP, revPBE-D3 C9 TZVP, revPBE-D3 BJ TZVP, RPBE-D3 TZVP, RPBE-D3 C9 TZVP, RPBE-D3 C9 TZV2PX, RPBE-D3 BJ TZVP, SSB-D3 TZVP, SSB-D3 C9 TZVP, SSB-D3 C9 TZV2PX, SSB-D3 BJ TZVP, revSSB-D3 TZVP, revSSB-D3 C9 TZVP, revSSB-D3 C9 TZV2PX, revSSB-D3 BJ TZVP, BLYP-D3 TZVP, BLYP-D3 C9 TZVP …]
